# Supplementary material for: Endovascular Aneurysm Sac Embolization for Treatment of Ruptured Aneurysms in the Aortoiliac Segment Using N-Butyl-Cyanoacrylate
Source: MDPI journal article supplement (doi:10.3390/life13040919), 2023-03-31
Supplement: s1 [file s1]

**Table S1. Summary of periprocedural and follow-up data.**

| Periprocedural Results |        |             |                            |                         |                                                              |                                  |                           |                  |                |                               | Follow-up Results |                                     |                 |
|------------------------|--------|-------------|----------------------------|-------------------------|--------------------------------------------------------------|----------------------------------|---------------------------|------------------|----------------|-------------------------------|-------------------|-------------------------------------|-----------------|
| Patient No.            | Gender | Age         | Aneurysm location          | Type of implanted graft | Stent-graft                                                  | Intervention duration in minutes | Radiation dose in cGy/cm2 | Histoacryl in ml | Lipiodol in ml | Volume of embolic agent in ml | Deaths            | Latest available follow-up (months) | Reinterventions |
| 1                      | Male   | 71          | Left internal iliac artery | Unilateral              | Endurant (Medtronic)                                         | 28                               | 2569                      | 1.5              | 4.5            | 6                             |                   | 5                                   | 0               |
| 2                      | Male   | 69          | Left internal iliac artery | Unilateral              | ETLW (Medtronic)                                             | 63                               | 8996                      | 3                | 8              | 11                            |                   | 35                                  | 0               |
| 3                      | Male   | 87          | Aortobiiliac               | Bilateral               | Excluder (Gore Medical)                                      | 109                              | 11508                     | 3                | 10             | 13                            | X                 |                                     |                 |
| 4                      | Male   | 83          | Thoracoabdominal aorta     | Fenestrated             | Endurant (Medtronic) + cTAG (Gore Medical) + E-nside (Jotec) | 269                              | 29190                     | 2                | 10             | 12                            |                   | 27                                  | 0               |
| 5                      | Male   | 81          | Infrarenal aorta           | Cuff                    | Endurant IIs (Medtronic)                                     | 107                              | 15037                     | 2.5              | 8              | 10.5                          | X                 |                                     |                 |
| 6                      | Male   | 60          | Infrarenal aorta           | Bilateral               | E-liac (Jotec) + Excluder (Medtronic)                        | 71                               | 10497                     | 2                | 10             | 12                            |                   | 1                                   | 0               |
| Mean                   |        | 75.2 ± 10.2 |                            |                         |                                                              | 107.8 ± 84.5                     | 12966.1 ± 8939.6          | 2.33             | 8.42           | 10.75 ± 2.4                   |                   |                                     |                 |
